# Supplementary material for: RAiSD detects positive selection based on multiple signatures of a selective sweep and SNP vectors
Source: PubMed Central journal article supplement (PMC6123745; doi:10.1038/s42003-018-0085-8), 2018-06-27
Supplement: 42003_2018_85_MOESM1_ESM.pdf [file 42003_2018_85_MOESM1_ESM.pdf]

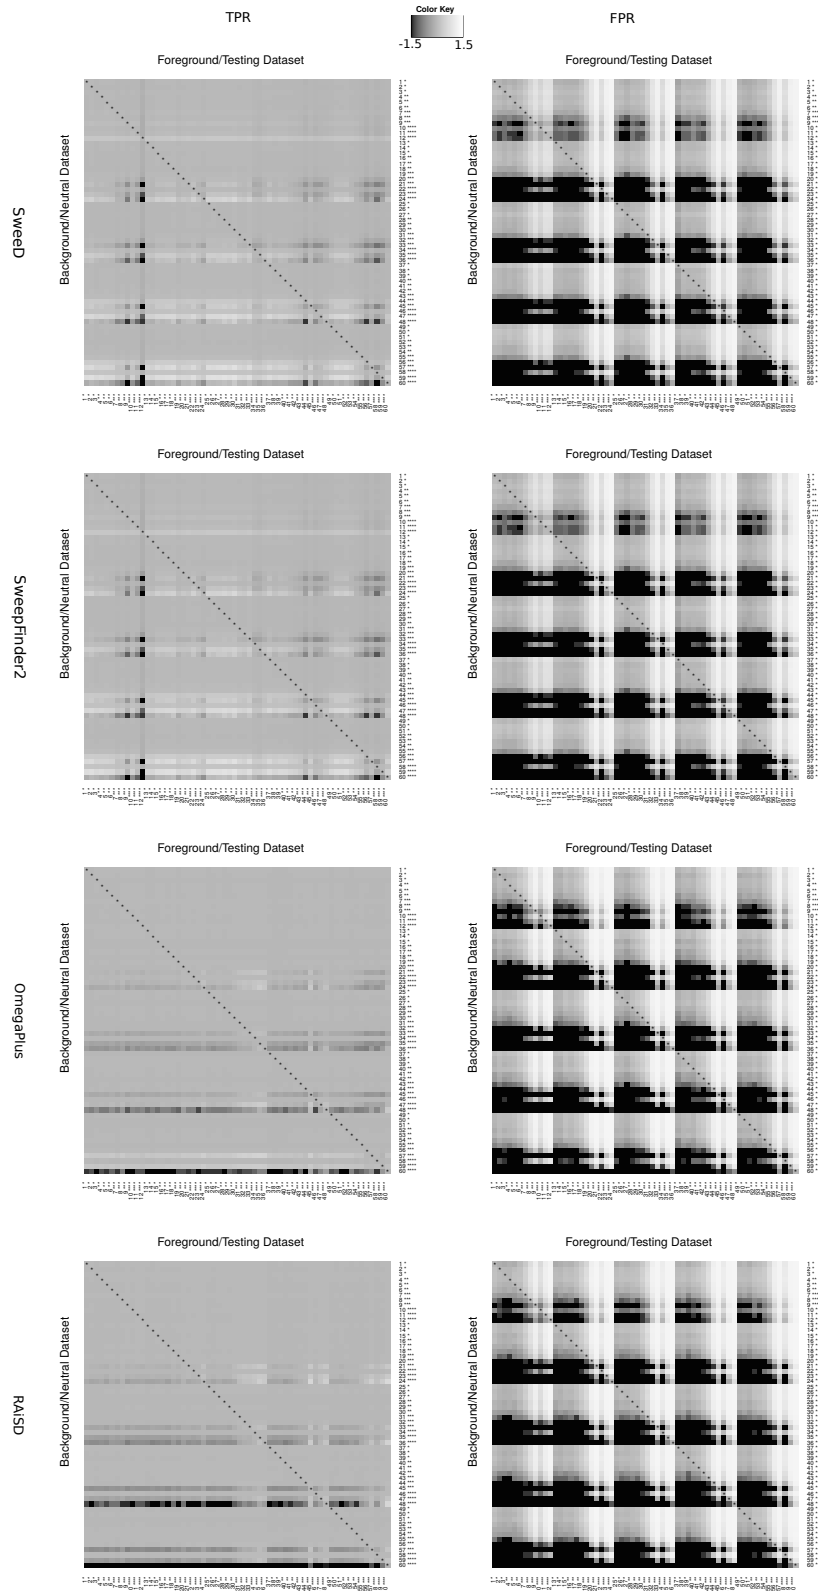

**Supplementary Figure 1: True positive rate (TPR) and false positive rate (FPR) for the 60 demographic models with bottlenecks (datasets 1–60) for SweeD, SweepFinder2, OmegaPlus, and RAiSD.** Neutral models (y-axis) were used to calculate the significance threshold. The TPR is calculated using models with selection (x-axis, TPR heatmaps), and the FPR is calculated using models without selection (x-axis, FPR heatmaps). The diagonal corresponds to the case where both the neutral and the selection (neutral for calculating the FPR) models come from the same demographic scenario. Off-diagonal elements have been scaled relatively to the diagonal. Darker gray tones represent cases where TPR/FPR is lower than the diagonal, whereas lighter gray tones represent cases where TPR/FPR is greater than the diagonal.

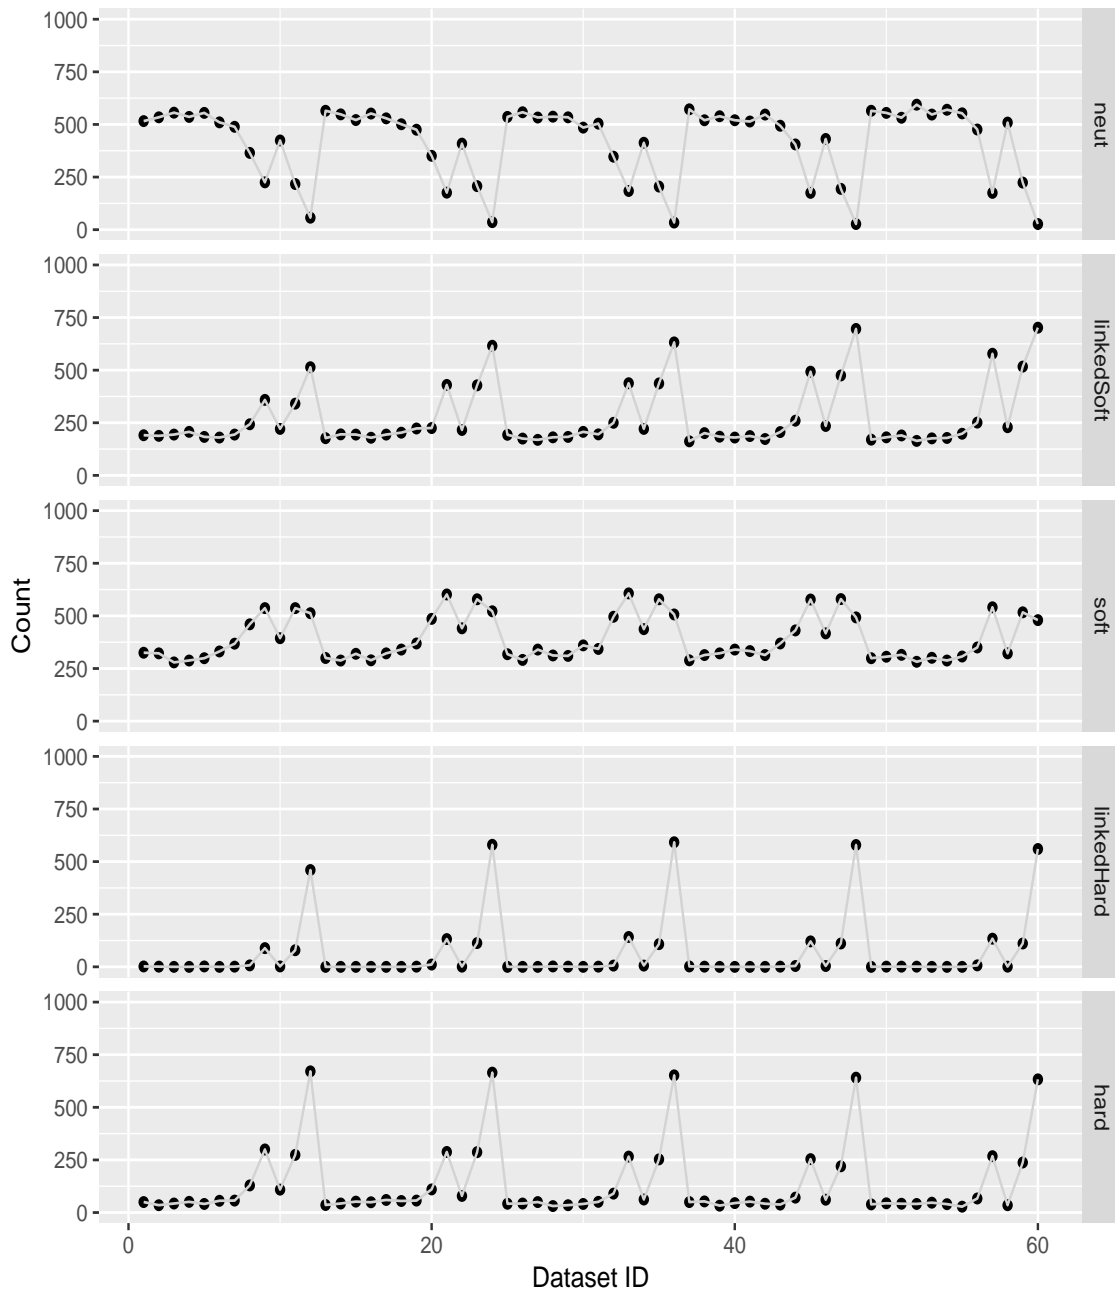

**Supplementary Figure 2: Classification of regions in the 60 neutral simulated datasets with bottlenecks (datasets 1–60) by S/HIC.** S/HIC classifies subgenomic regions as either hard sweep, soft sweep, linked-hard, linked- soft, or neutral. Linked-soft and linked-hard regions are neutral regions in the proximity (thus linked) of a soft and a hard selective sweep, respectively. As can be observed, S/HIC classified several regions in the 60 neutral simulated datasets as either soft sweeps, linked soft, hard sweeps, or linked hard, even though no selective sweeps were present.

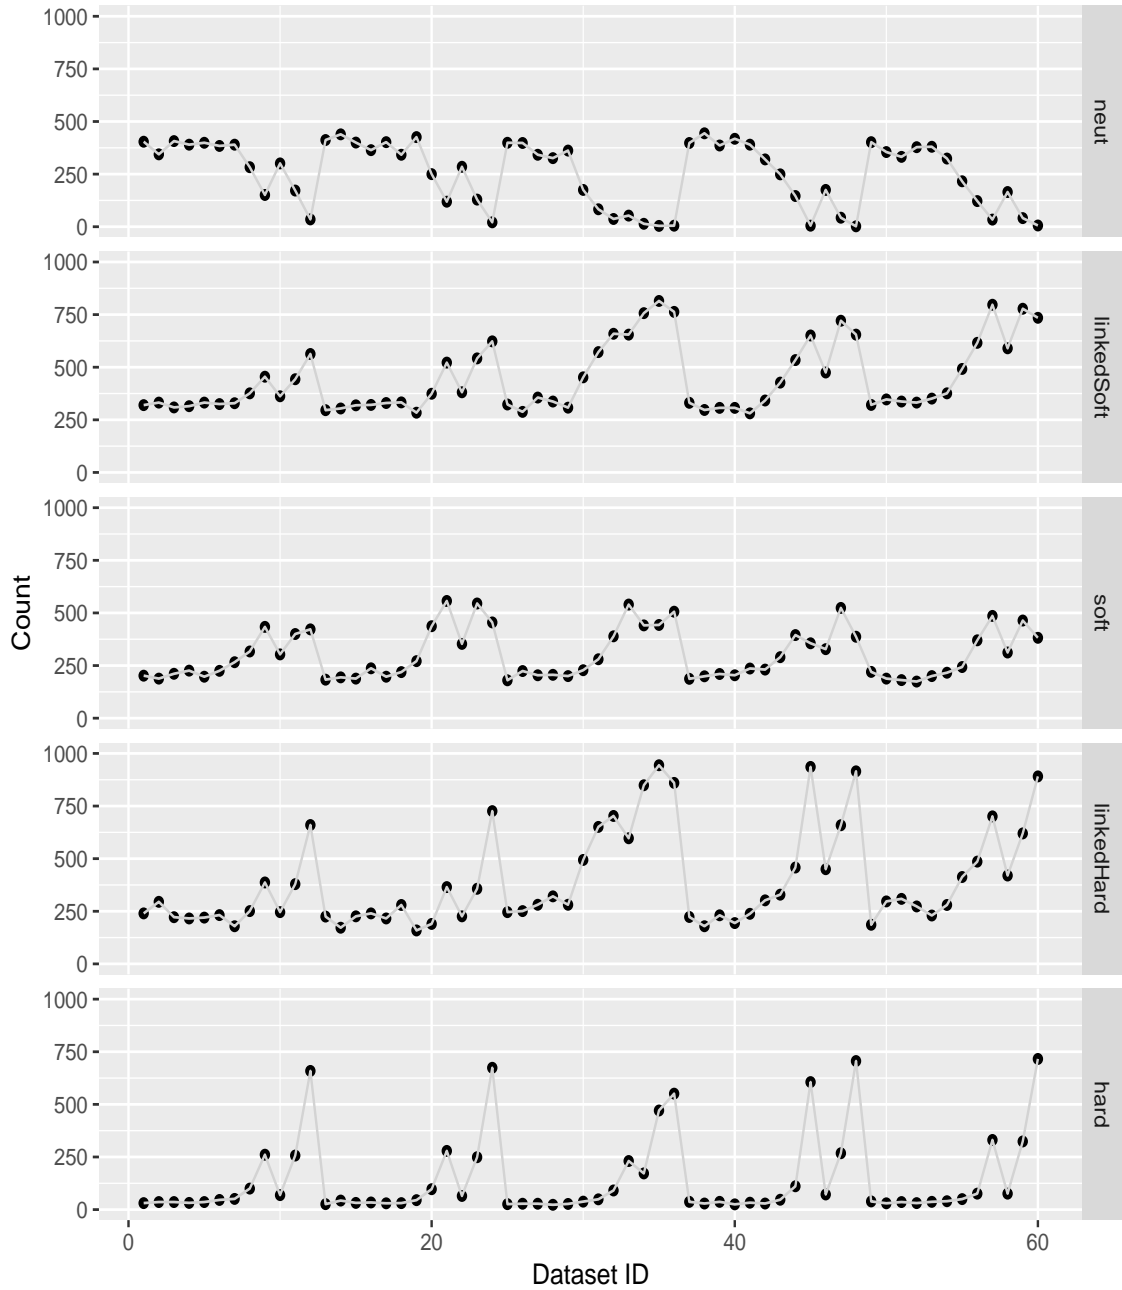

**Supplementary Figure 3: Classification of regions in the 60 simulated datasets with bottlenecks and a hard selective sweep (datasets 1–60) by S/HIC.** S/HIC classifies subgenomic regions as either hard sweep, soft sweep, linked- hard, linked-soft, or neutral. Linked-soft and linked-hard regions are neutral regions in the proximity (thus linked) of a soft and a hard selective sweep, respectively. As can be observed, S/HIC classified several regions in the 60 simulated datasets as either soft selective sweeps or linked soft, even though no soft selective sweeps were present.

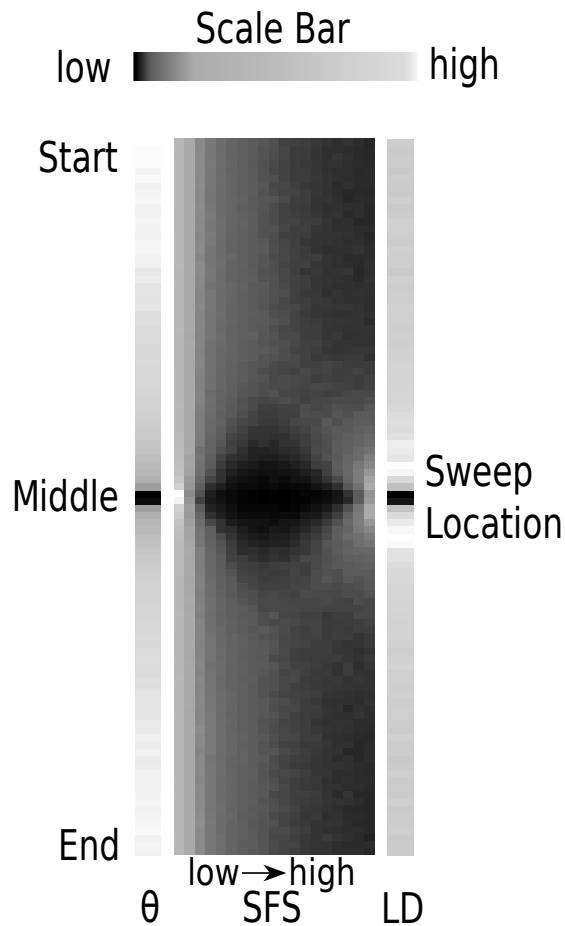

**Supplementary Figure 4: The three signatures of a selective sweep.** The figure illustrates the genetic variation (measured by Watterson's  $\theta_W$  [1]), the shift of the SFS, and the emergence of LD patterns (measured by Wall's B statistic [2]) in the neighborhood of a selective sweep. The statistic values are averaged over 1,000 simulations with a selective sweep at the center of a 1-Mb genomic region. Simulations were conducted using the software mssel (kindly provided by R.R. Hudson), with  $\theta = 2,000$ ,  $r = 2,000$ , and 2,000 recombination breakpoints. The population experienced a very mild bottleneck (0.5 of the present-day population size) at time 0.1 and recovered to the present-day size at time 0.1004. The figure shows that i) the average value of  $\theta_W$  decreases near the sweep location, ii) the SFS obtains a U-shape pattern, with the number of low- and high-frequency derived variants elevated in comparison with the middle-frequency ones, and iii) the levels of LD increase locally in the two neighboring regions flanking the sweep location but not between them. The different shades of gray indicate low and high values, as described by the scale bar. In the leftmost heatmap,  $\theta$  represents the expected (average) diversity, measured by Watterson's  $\theta_W$ . The panel in the middle shows the SFS as it shifts from low-frequency derived variants to high-frequency ones. The rightmost heatmap shows the LD pattern, measured by Wall's B statistic, i.e., the number of congruent consecutive SNPs.

Supplementary Table 1

| Seqnames | start     | end       | width    | strand | gene_id   | symbol        |
|----------|-----------|-----------|----------|--------|-----------|---------------|
| chr5     | 69812079  | 70585523  | 773445   | -      | 100049076 | GUSBP9        |
| chr16    | 22503062  | 22547841  | 44780    | +      | 100132247 | NPIP5         |
| chr15    | 82647286  | 83084729  | 437444   | +      | 100133144 | NA            |
| chr15    | 82647286  | 83084341  | 437056   | +      | 100134869 | UBE2Q2P2      |
| chr16    | 21415198  | 21531765  | 116568   | -      | 100271836 | SMG1P3        |
| chr1     | 144146811 | 146467744 | 2320934  | +      | 100288142 | NBPF20        |
| chr8     | 86566828  | 86757761  | 190934   | -      | 100288527 | REXO1L2P      |
| chr15    | 82821161  | 83209208  | 388048   | -      | 100505503 | NA            |
| chr16    | 29465871  | 30215650  | 749780   | +      | 100526831 | SLX1B-SULT1A4 |
| chr5     | 69422177  | 69881549  | 459373   | -      | 11039     | SMA4          |
| chr5     | 69497639  | 69881549  | 383911   | -      | 11042     | SMA5          |
| chr3     | 66119285  | 66438532  | 319248   | +      | 115286    | SLC25A26      |
| chr7     | 153584419 | 154685995 | 1101577  | +      | 1804      | DPP6          |
| chr20    | 34894303  | 35157040  | 262738   | +      | 22839     | DLGAP4        |
| chr16    | 21413455  | 21458484  | 45030    | -      | 23117     | NPIP3         |
| chr22    | 21771693  | 21805750  | 34058    | +      | 23119     | HIC2          |
| chr8     | 86568695  | 86840171  | 271477   | -      | 254958    | REXO1L1P      |
| chr1     | 148003642 | 148346929 | 343288   | -      | 25832     | NBPF14        |
| chr15    | 30488239  | 30665668  | 177430   | +      | 26082     | DKFZP434L187  |
| chr7     | 130146080 | 130353598 | 207519   | -      | 26958     | COPG2         |
| chr16    | 18511182  | 18573434  | 62253    | -      | 283820    | NOMO2         |
| chr9     | 42844370  | 67032072  | 24187703 | -      | 286297    | LOC286297     |
| chr7     | 74601106  | 74867341  | 266236   | -      | 2970      | GTF2IP1       |
| chr15    | 29131168  | 29410516  | 279349   | +      | 321       | APBA2         |
| chr22    | 21827287  | 21871780  | 44494    | -      | 375133    | PI4KAP2       |
| chr17    | 34538468  | 34641846  | 103379   | +      | 388372    | CCL4L1        |
| chr1     | 147835127 | 148176401 | 341275   | -      | 388685    | LINC01138     |
| chr7     | 74379083  | 74438803  | 59721    | +      | 389523    | NA            |
| chr15    | 82585621  | 82924242  | 338622   | +      | 390660    | ADAMTS7P1     |
| chr19    | 197016    | 202209    | 5194     | -      | 399844    | LINC01002     |
| chr9     | 39443818  | 41592207  | 2148390  | -      | 401509    | ZNF658B       |
| chr17    | 34522268  | 34625716  | 103449   | -      | 414062    | CCL3L3        |
| chr15    | 82711895  | 83108111  | 396217   | +      | 440295    | GOLGA6L9      |
| chr16    | 29454226  | 30282198  | 827973   | -      | 440354    | SMG1P2        |
| chr12    | 132680917 | 132905905 | 224989   | -      | 50614     | GALNT9        |
| chr8     | 145192672 | 145440828 | 248157   | +      | 51236     | HGH1          |
| chr16    | 29465822  | 30208887  | 743066   | +      | 548593    | SLX1A         |
| chr16    | 29454226  | 30205627  | 751402   | -      | 552900    | BOLA2         |
| chr10    | 47894023  | 51893269  | 3999247  | +      | 55747     | NA            |
| chr13    | 114321597 | 114438637 | 117041   | +      | 6011      | GRK1          |
| chr16    | 29460666  | 30200575  | 739910   | +      | 606724    | LOC606724     |
| chr16    | 29476289  | 30218248  | 741960   | -      | 613038    | LOC613038     |
| chr17    | 34522268  | 34625730  | 103463   | -      | 6349      | CCL3L1        |
| chr16    | 22448329  | 22503541  | 55213    | +      | 641298    | SMG1P1        |
| chr5     | 138778005 | 138842320 | 64316    | -      | 641700    | ECSCR         |
| chr9     | 39355699  | 39891210  | 535512   | +      | 642265    | NA            |
| chr15    | 84868830  | 85748518  | 879689   | -      | 642423    | LOC642423     |
| chr8     | 145321517 | 145492131 | 170615   | +      | 642658    | SCX           |
| chr16    | 14805546  | 14859315  | 53770    | +      | 642778    | NPIPA3        |
| chr15    | 82633123  | 83018198  | 385076   | -      | 647042    | GOLGA6L10     |
| chr5     | 68921201  | 69586004  | 664804   | -      | 653188    | GUSBP3        |
| chr9     | 39443814  | 41609544  | 2165731  | -      | 653501    | NA            |

|       |           |           |        |   |        |           |
|-------|-----------|-----------|--------|---|--------|-----------|
| chr1  | 144676437 | 145039992 | 363556 | - | 653513 | LOC653513 |
| chr17 | 34581085  | 34808103  | 227019 | - | 654341 | NA        |
| chr5  | 69345350  | 70247953  | 902604 | + | 6606   | SMN1      |
| chr5  | 69345350  | 70248842  | 903493 | + | 6607   | SMN2      |
| chr16 | 29471207  | 29476301  | 5095   | + | 6818   | SULT1A3   |
| chr10 | 51224681  | 51371331  | 146651 | - | 728404 | NA        |
| chr10 | 51253908  | 51371316  | 117409 | - | 728407 | PARGP1    |
| chr10 | 48844036  | 49383240  | 539205 | - | 728798 | FRMPD2B   |
| chr1  | 144300512 | 144521969 | 221458 | - | 728875 | NA        |
| chr7  | 74807605  | 74867341  | 59737  | - | 729438 | GATSL2    |
| chr17 | 34745936  | 34806015  | 60080  | - | 729877 | TBC1D3H   |
| chr9  | 73149966  | 74061820  | 911855 | - | 80036  | TRPM3     |
| chr5  | 69321072  | 70214357  | 893286 | + | 8293   | SERF1A    |
| chr10 | 51026325  | 51729967  | 703643 | - | 8505   | PARG      |
| chr15 | 30653443  | 30685864  | 32422  | - | 89832  | CHRFAM7A  |
| chr1  | 144676437 | 145076186 | 399750 | - | 9659   | PDE4DIP   |
| chr1  | 17066768  | 17299474  | 232707 | + | 9696   | CROCC     |

Short list of 60 genes with the highest RAiSD scores (top 0.05%), based on the analysis of the whole set of human autosomes (1000 Genomes data).

## Supplementary Note 1

Current detection methods, such as SweepFinder [3], SweepFinder2 [4], SweeD [5], and OmegaPlus [6], require several input parameters. Some of these parameters (other parameters simply affect the format of the generated output files) determine how exhaustively each tool is going to scan a dataset. This is the case for the input parameter “-s” in SweepFinder and SweepFinder2, for instance, which allows the user to provide the number of genomic locations to evaluate the CLR test. Identical functionality provides the “-grid” parameter in SweeD and OmegaPlus, with the former evaluating the CLR test [3] while the latter calculating the  $\omega$  statistic [7]. The aforementioned implementations construct a grid of equidistant locations to evaluate, based on the locations of the first and the last SNPs in the input data. This approach has implications on the accuracy of the detection process, as well as on the computational efficiency of the applied methods. This is due to the fact that the user’s choice of the grid size and the location of the first and the last SNPs may lead to execution scenarios where no grid point is placed in the region of a selected locus. Without any candidate location to test for selection near a selected locus, the detection process will fail to accurately localize the selection target regardless of the implemented method. In addition, the placement of grid points along a genome is based on the size of the evaluated genomic region in base-pairs (bp), e.g., a grid point per kb. Given that only polymorphic sites are informative for the detection process, a bp-based creation of the evaluation grid may lead to redundant calculations in regions with a reduced number of SNPs. The requirement for input parameters inevitably turns the analysis to a function of the user-provided values, yielding highly probable that multiple runs of the same software processing the same dataset can lead to different outcomes, and thus different biological conclusions. The recently released software SweepFinder2[4] provides an alternative approach to the “-s” parameter by allowing the user to provide an additional input file with the locations of interest for the calculation of the CLR test. Nevertheless, the aforementioned problem remains, since the CLR locations are still determined by the user. An arbitrary choice for the grid size directs the tools to place the nearest CLR location to the selection target far from the actual point of interest in roughly half of the cases. Expectedly, increasing the grid size lowers the chances of missing the selection target, which, nevertheless, leads to considerably longer execution times.

## Supplementary Discussion

The following report should not be considered as an effort to provide validity to our results simply because they make sense.

Beleza et al. [8] reported that the *APBA2* gene (located on chromosome 15, region: 29,131,168 - 29,410,516) is significantly associated with skin color (p value:  $1.5 \times 10^{-8}$ ). The gene *APBA2*, along with *SLC24A5*, *TYR*, and *SLC24A2*, account for 35% of the total variance for the skin color. The same study reported that the CMS score for *APBA2* is significantly higher than expected, indicating that *APBA2* has evolved under strong positive selection. Other genes reported by this study [8] to affect the skin or eye color have not been found in our list of the top 0.05% genes.

Bradley and Benner[9] performed a phylogenomics analysis to gain insight into the function of a gene family of low copy repeats (LCRs) that contains the sulfotransferase (*SULT*) genes which are involved in drug metabolism, cancer, and hormone regulation. The study presented a model of expansion of this family in the hominoid lineage, a member of which is the *SULT1A3* gene. Positively selected protein sites that might have been central in adapting the *SULT1A3* enzyme were identified using  $K_a/K_s$ , the ratio of non-synonymous to synonymous substitutions. The study suggested that the adaptive nucleotide substitutions control the substrate specificity [9]. Another locus that RAIiSD reports as an outlier is the *DKFZP434L187* gene. Using the  $F_{ST}$ -based  $\beta$  statistic, Storz et al. [10] reported evidence of positive selection in populations *outside* Africa for this locus. They conducted a multilocus scan of microsatellite variability to identify regions of the human genome subject to continent-specific hitchhiking events. In contrast, we found evidence of positive selection in YRI, which is an African population, using, however, additional signatures (i.e., SFS- and LD-based ones) instead of only the local reduction of genomic diversity.

The aforementioned three genes are among the top 0.05% of RAIiSD results over the entire genome. The *DUFFY* locus (also known as *DARC* or *ACKR1*), a canonical example of positive selection in humans [11, 12, 13, 14], is located in chromosome 1 (region 159,173,803–159,176,290 in hg19) and encodes a chemokine receptor that plays a major role in the infection of red blood cells by *Plasmodium vivax*, a causative agent for malaria. RAIiSD evaluated two positions within

the *DUFFY* locus, 159,174,112 and 159,174,898, with p-values 0.01217 and 0.0036, respectively, compared to the rest of the evaluated positions in chromosome 1. With respect to the whole genome, the Duffy locus is among the top 5% of the results. SweeD, SweepFinder2, and OmegaPlus did not evaluate any position inside the Duffy locus due to the used grid size (10,000). The closest OmegaPlus position was 159,167,328, with a p-value of 0.022, whereas both SweeD's and SweepFinder2's closest position was 159,184,722, with p-values of 0.2136 and 0.2245, respectively. Note that, despite SweeD, SweepFinder2, and OmegaPlus using the same grid size, the evaluated positions were not identical due to numerical accuracy differences in the calculation of the decimal representation for the locations.

## Supplementary References

- [1] Watterson, G. On the number of segregating sites in genetical models without recombination. *Theor. Popul. Biol.* **7**, 256–276 (1975).
- [2] Wall, J. D. Recombination and the power of statistical tests of neutrality. *Genet. Res.* **74**, 65–79 (1999).
- [3] Nielsen, R. *et al.* Genomic scans for selective sweeps using snp data. *Genome Res.* **15**, 1566–1575 (2005).
- [4] DeGiorgio, M., Huber, C. D., Hubisz, M. J., Hellmann, I. & Nielsen, R. Sweepfinder2: increased sensitivity, robustness and flexibility. *Bioinformatics* **32**, 1895–1897 (2016).
- [5] Pavlidis, P., Živković, D., Stamatakis, A. & Alachiotis, N. SweeD: likelihood-based detection of selective sweeps in thousands of genomes. *Mol. Biol. Evol.* **30**, 2224–2234 (2013).
- [6] Alachiotis, N., Stamatakis, A. & Pavlidis, P. Omegaplus: a scalable tool for rapid detection of selective sweeps in whole-genome datasets. *Bioinformatics* **28**, 2274–2275 (2012).
- [7] Kim, Y. & Nielsen, R. Linkage disequilibrium as a signature of selective sweeps. *Genetics* **167**, 1513–1524 (2004).
- [8] Beleza, S. *et al.* Genetic architecture of skin and eye color in an african-european admixed population. *PLoS Genet.* **9**, e1003372 (2013).
- [9] Bradley, M. E. & Benner, S. A. Phylogenomic approaches to common problems encountered in the analysis of low copy repeats: The sulfotransferase 1a gene family example. *BMC Evol. Biol.* **5**, 22 (2005).
- [10] Storz, J. F., Payseur, B. A. & Nachman, M. W. Genome scans of dna variability in humans reveal evidence for selective sweeps outside of africa. *Mol. Biol. Evol.* **21**, 1800–1811 (2004).
- [11] Sabeti, P. C. *et al.* Positive natural selection in the human lineage. *Science* **312**, 1614–20 (2006).
- [12] Vallender, E. J. & Lahn, B. T. Positive selection on the human genome. *Hum. Mol. Genet.* **13**, R245–R254 (2004).
- [13] Oleksyk, T. K., Smith, M. W. & O'Brien, S. J. Genome-wide scans for footprints of natural selection. *Philos. Trans. R. Soc. Lond., B, Biol. Sci.* **365**, 185–205 (2010).
- [14] McManus, K. F. *et al.* Population genetic analysis of the darc locus (duffy) reveals adaptation from standing variation associated with malaria resistance in humans. *PLoS Genet.* **13**, e1006560 (2017).
