# Supplementary material for: RAiSD detects positive selection based on multiple signatures of a selective sweep and SNP vectors
Source: PubMed Central journal article supplement (PMC6123745; doi:10.1038/s42003-018-0085-8), 2018-06-27
Supplement: 42003_2018_85_MOESM2_ESM.pdf [file 42003_2018_85_MOESM2_ESM.pdf]

## **Description of Additional Supplementary Files**

File Name: Supplementary Data 1

Description: Command lines for dataset generation. Lines 1-113 contain command lines for BASE datasets, i.e., those used to calculate the cutoff value. Lines 114-226 contain command lines for TEST datasets, i.e., those used to test for selection and/or the effect of confounding factors. The trajectory files are available at: <https://doi.org/10.6084/m9.figshare.6339533>.
